# Supplementary material
Source: PubMed Central journal article supplement (PMC1458990)

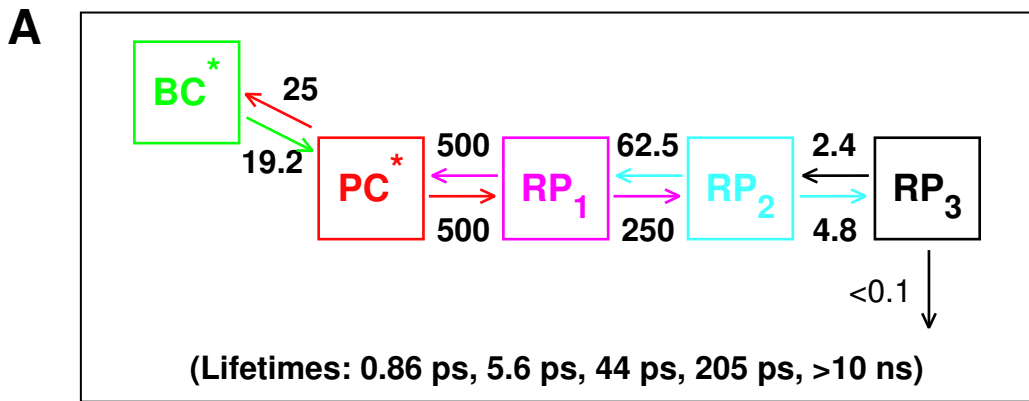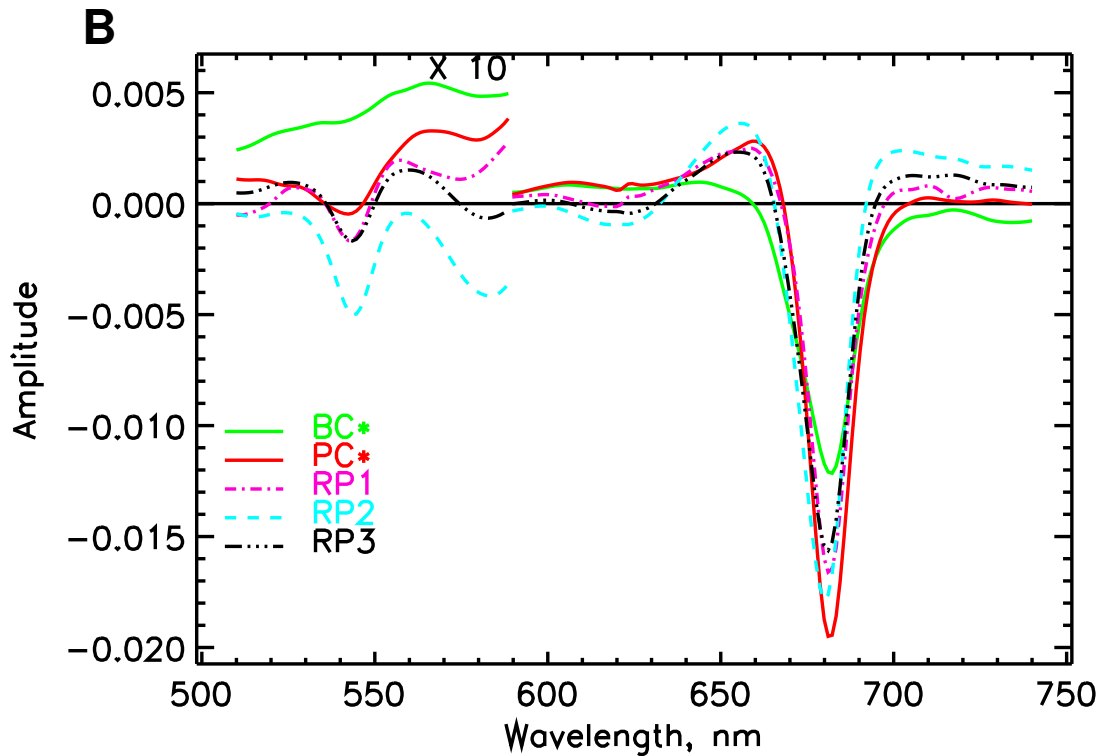

Supplement: pnas_0505371103_1.pdf [file pnas_0505371103_1.pdf]

**A**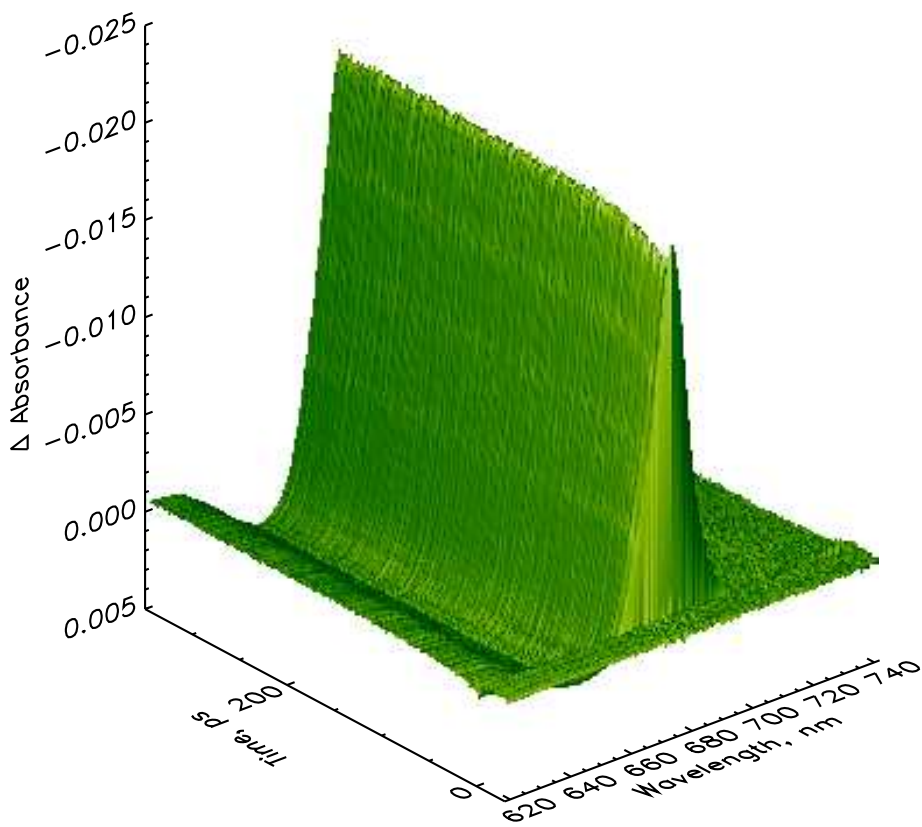**B**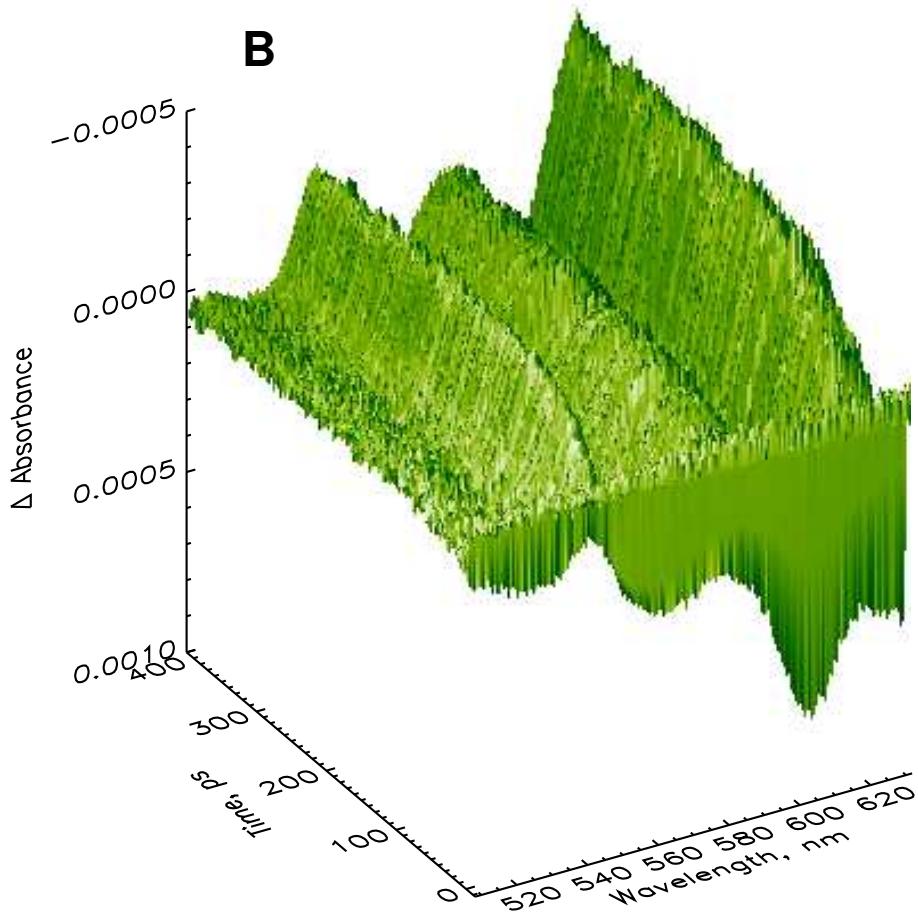

Supplement: pnas_0505371103_2.pdf [file pnas_0505371103_2.pdf]

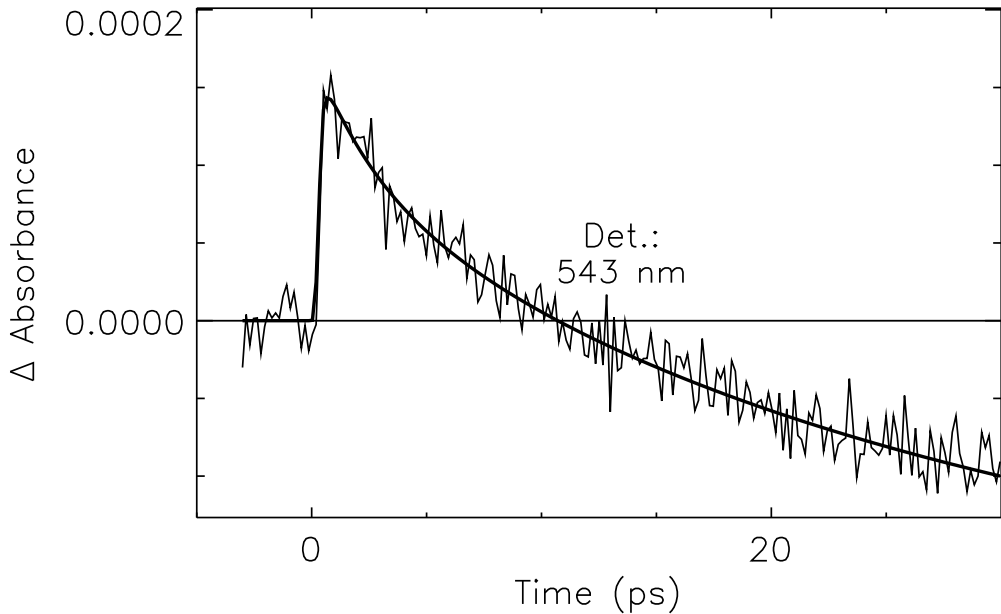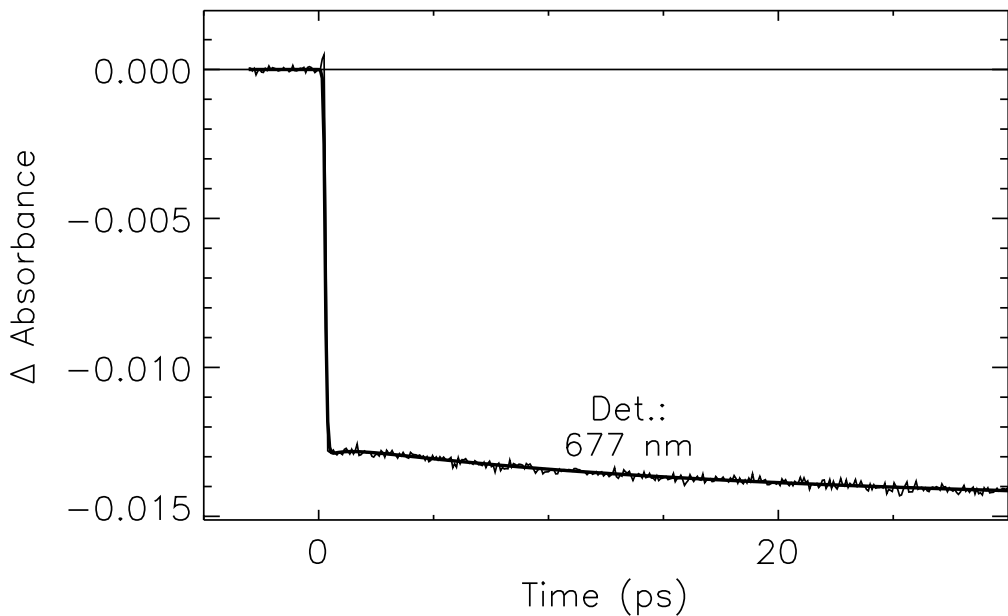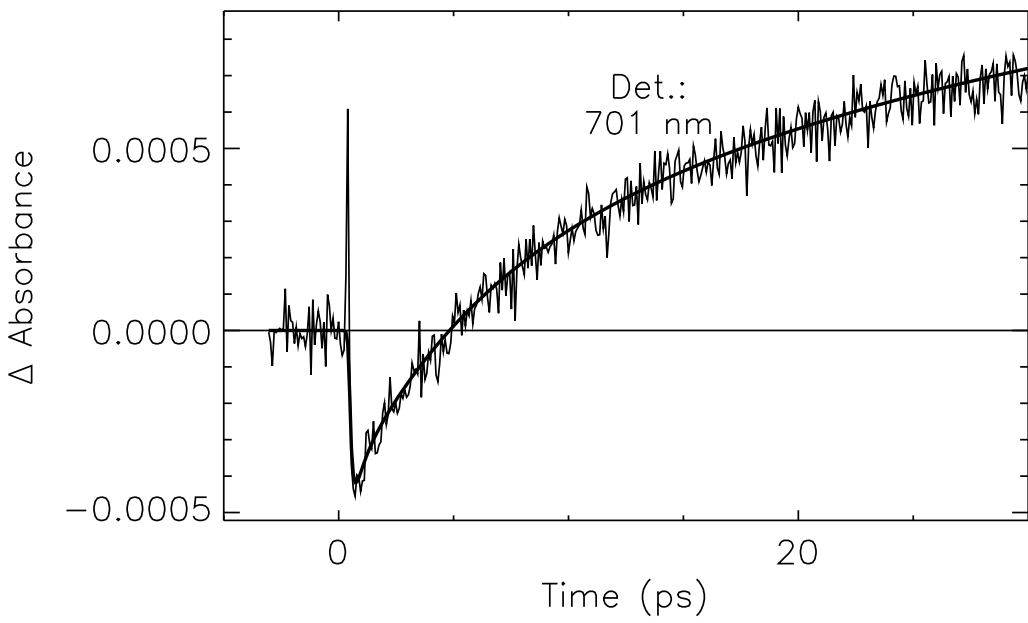

Supplement: pnas_0505371103_3.pdf [file pnas_0505371103_3.pdf]

**A**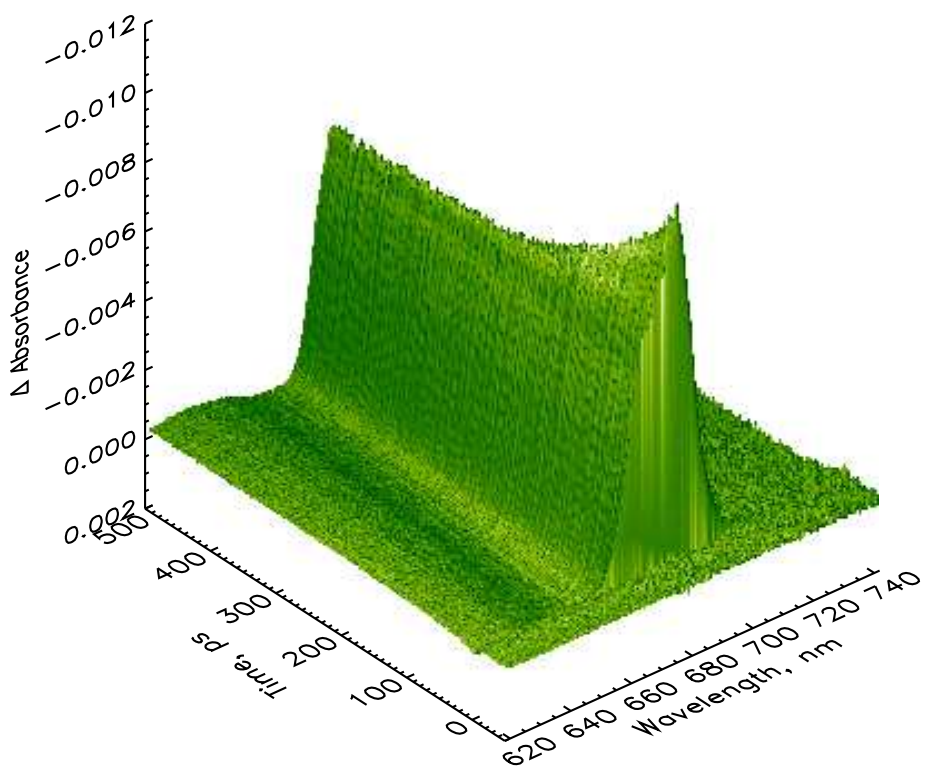**B**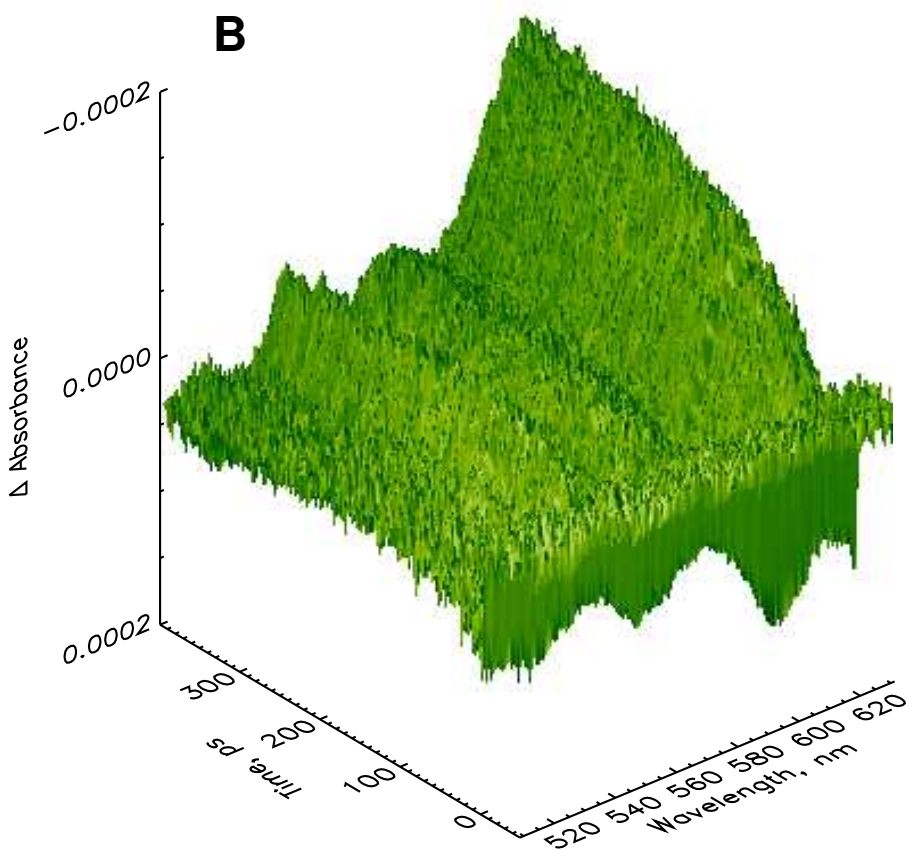

Supplement: pnas_0505371103_4.pdf [file pnas_0505371103_4.pdf]

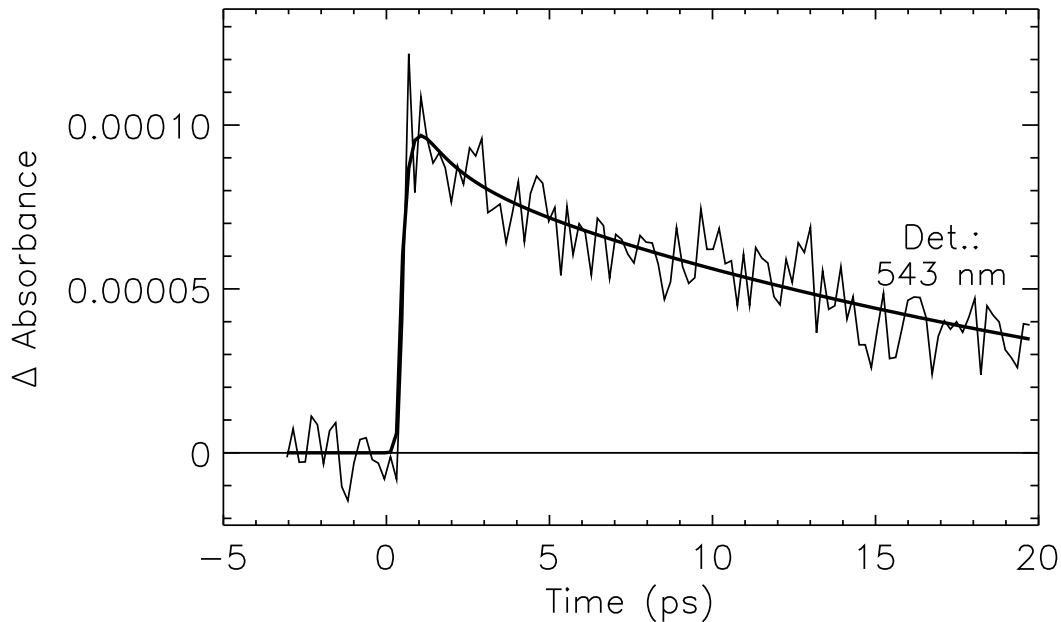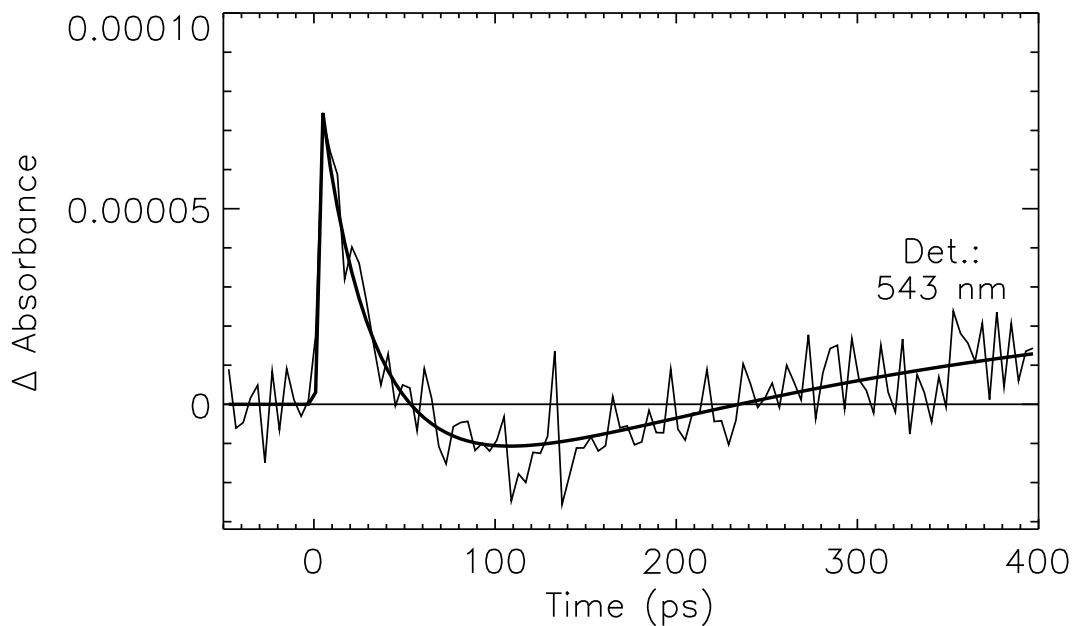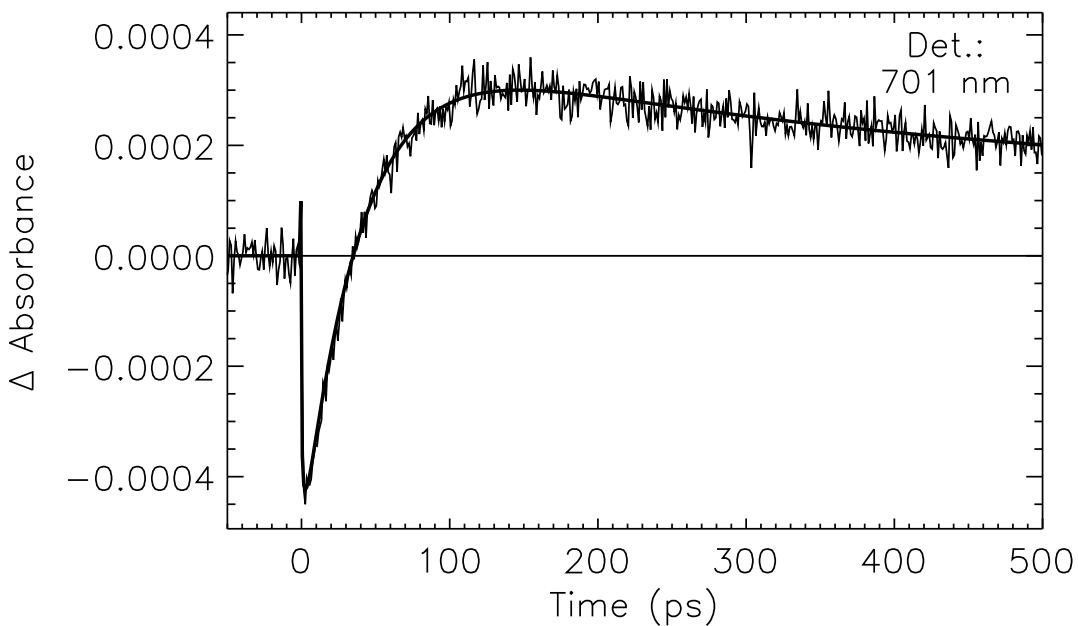

Supplement: pnas_0505371103_5.pdf [file pnas_0505371103_5.pdf]

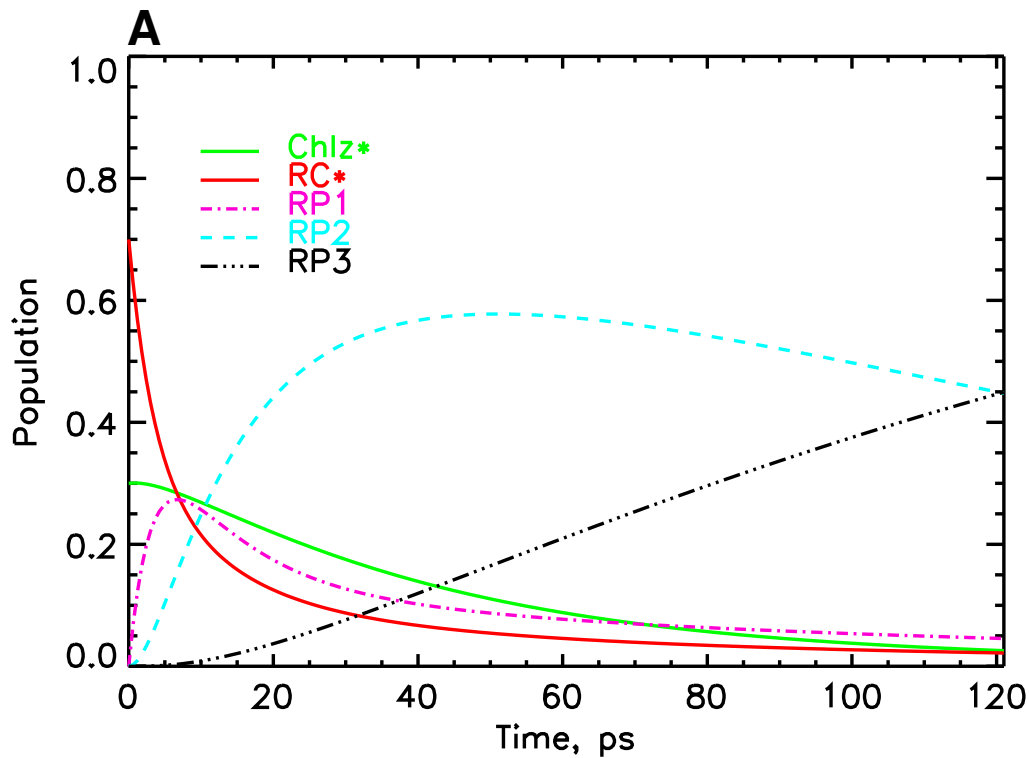

**B**

| $\tau$        | Chlz*  | RC*   | RP <sub>1</sub> | RP <sub>2</sub> | RP <sub>3</sub> |
|---------------|--------|-------|-----------------|-----------------|-----------------|
| [Exc          | 0.3    | 0.7   | 0               | 0               | 0]              |
| <b>3.2 ps</b> | -0.017 | 0.332 | -0.522          | 0.215           | -0.005          |
| <b>11 ps</b>  | -0.059 | 0.242 | 0.374           | -0.609          | 0.054           |
| <b>37 ps</b>  | 0.349  | 0.083 | 0.049           | -0.685          | 0.210           |
| <b>135 ps</b> | 0.027  | 0.041 | 0.095           | 1.022           | -1.197          |
| <b>10 ns</b>  | 0.001  | 0.002 | 0.005           | 0.059           | 0.939           |

Supplement: pnas_0505371103_6.pdf [file pnas_0505371103_6.pdf]
